# Supplementary figures and images for: Establishment of a Pseudovirus Platform for Neuraminidase Inhibiting Antibody Analysis
Source: MDPI journal article supplement (doi:10.3390/ijms24032376), 2023-01-25

A

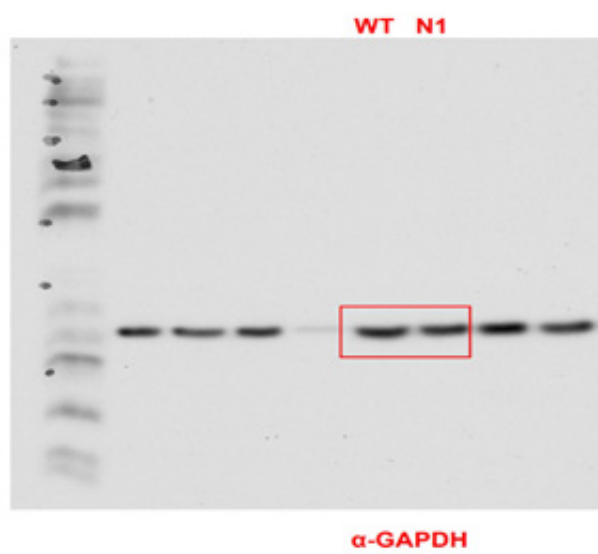

B

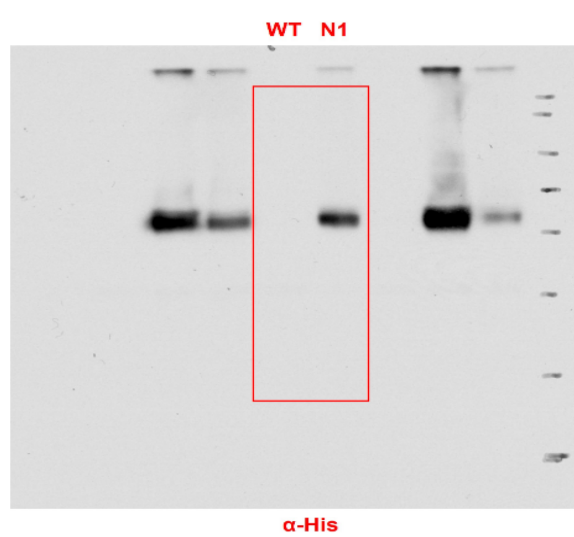

Supplementary S1. The original images of western blots.

Supplement: s1 [file s1]
